# Supplementary material for: Association between antibiotic resistance and increasing ambient temperature in China: An ecological study with nationwide panel data
Source: PubMed Central journal article supplement — Lancet Reg Health West Pac. 2022 Nov 14;30:100628. doi: 10.1016/j.lanwpc.2022.100628 (PMC9672962; doi:10.1016/j.lanwpc.2022.100628), 2022-11-14

# Association between Antibiotic Resistance and Increasing Ambient Temperature in China: An Ecological Study with Nationwide Panel Data

## Supplementary Material

### Statistical modeling

Considering the existence of unobserved influencing factors, we conducted panel data analyses to address potential spatial-temporal heterogeneity. The F test (**Supplementary Table S1**) and Hausman test (**Supplementary Table S2**) indicate that a fixed effect model is more suitable for panel data analyses. We then established models with fixed individual effects (**Supplementary Table S3-1**), with fixed time effects (**Supplementary Table S3-2**) and with two-way fixed effects (**Supplementary Table S3-3**), respectively.

### Supplementary Table S1.

Comparison of the within and the pooling model.

| F test             | CRAB     |            |            |          | CRKP     |            |            |          | CRPA     |            |            |          |
|--------------------|----------|------------|------------|----------|----------|------------|------------|----------|----------|------------|------------|----------|
|                    | <i>F</i> | <i>df1</i> | <i>df2</i> | <i>p</i> | <i>F</i> | <i>df1</i> | <i>df2</i> | <i>p</i> | <i>F</i> | <i>df1</i> | <i>df2</i> | <i>p</i> |
| Individual effects | 8.27     | 27         | 163        | <0.001   | 5.25     | 27         | 165        | <0.001   | 6.15     | 25         | 163        | <0.001   |
| Time effects       | 2.98     | 13         | 177        | <0.001   | 1.08     | 13         | 179        | 0.378    | 1.67     | 13         | 175        | 0.072    |
| Two-way effects    | 6.07     | 40         | 150        | <0.001   | 3.57     | 40         | 152        | <0.001   | 4.66     | 38         | 150        | <0.001   |

### Supplementary Table S2.

Specification test for panel models. The random effects models (REM) were found to be inconsistent with the alternative specification. A fixed-effects model (FEM) is more suitable for the panel data.

| Hausman test                                         | CRAB     |           |          | CRKP     |           |          | CRPA     |           |          |
|------------------------------------------------------|----------|-----------|----------|----------|-----------|----------|----------|-----------|----------|
|                                                      | $\chi^2$ | <i>df</i> | <i>p</i> | $\chi^2$ | <i>df</i> | <i>p</i> | $\chi^2$ | <i>df</i> | <i>p</i> |
| Regression-based Hausman test                        | 54.22    | 10        | <0.001   | 39.75    | 10        | <0.001   | 23.51    | 10        | 0.009    |
| Robust Hausman test with vcov supplied as a function | 134.18   | 10        | <0.001   | 252.18   | 10        | <0.001   | 79.64    | 10        | <0.001   |

### Supplementary Table S3-1.

Rate ratios (RR) of predictors with fixed individual effects.

| Predictor                                    | CRAB      |          | CRKP      |          | CRPA      |          |
|----------------------------------------------|-----------|----------|-----------|----------|-----------|----------|
|                                              | <i>RR</i> | <i>p</i> | <i>RR</i> | <i>p</i> | <i>RR</i> | <i>p</i> |
| Antibiotic consumption (DDDs)                | 1.003     | 0.512    | 1.018     | 0.079    | 1.004     | 0.302    |
| Corruption Perceptions Index (CPI)           | 1.003     | 0.868    | 0.991     | 0.852    | 1.003     | 0.868    |
| Population density (person/km <sup>2</sup> ) | 1.000     | 0.563    | 1.004     | <0.001   | 1.000     | 0.310    |
| GDP per capita (Yuan)                        | 14.794    | <0.001   | 0.498     | 0.537    | 0.387     | 0.018    |
| Health facilities per 10,000 population      | 1.069     | 0.508    | 0.493     | 0.007    | 1.131     | 0.193    |
| Physicians per 10,000 population             | 0.978     | 0.002    | 1.026     | 0.163    | 1.006     | 0.370    |
| Hospital beds per 10,000 population          | 0.972     | 0.017    | 1.076     | 0.015    | 1.017     | 0.126    |
| Annual average humidity (%)                  | 1.001     | 0.951    | 0.940     | 0.045    | 1.006     | 0.559    |
| Annual average rainfall (mm)                 | 1.000     | 0.893    | 1.000     | 0.174    | 1.000     | 0.682    |
| Average ambient temperature (°C)             | 1.028     | 0.613    | 1.007     | 0.963    | 0.977     | 0.633    |

|             |       |       |        |
|-------------|-------|-------|--------|
| $R^2$       | 0.448 | 0.396 | 0.100  |
| adj.- $R^2$ | 0.323 | 0.260 | -0.093 |

Adj.- $R^2$ : adjusted coefficient of determination.

### Supplementary Table S3-2.

Rate ratios (RR) of predictors with fixed time effects.

| Predictor                                    | CRAB      |          | CRKP      |          | CRPA      |          |
|----------------------------------------------|-----------|----------|-----------|----------|-----------|----------|
|                                              | <i>RR</i> | <i>p</i> | <i>RR</i> | <i>p</i> | <i>RR</i> | <i>p</i> |
| Antibiotic consumption (DDDs)                | 1.004     | 0.594    | 1.055     | 0.009    | 1.000     | 0.987    |
| Population density (person/km <sup>2</sup> ) | 1.000     | 0.173    | 1.000     | 0.499    | 1.000     | 0.145    |
| GDP per capita (Yuan)                        | 0.957     | 0.726    | 0.585     | 0.082    | 1.196     | 0.104    |
| Health facilities per 10,000 population      | 0.958     | 0.052    | 0.756     | <0.001   | 0.953     | 0.012    |
| Physicians per 10,000 population             | 1.003     | 0.309    | 1.002     | 0.803    | 1.000     | 0.899    |
| Hospital beds per 10,000 population          | 1.021     | 0.001    | 1.060     | <0.001   | 1.025     | 0.000    |
| Annual average humidity (%)                  | 1.004     | 0.569    | 0.969     | 0.078    | 1.003     | 0.642    |
| Annual average rainfall (mm)                 | 1.000     | 0.240    | 1.000     | 0.329    | 1.000     | 0.008    |
| Average ambient temperature (°C)             | 1.023     | 0.156    | 1.131     | 0.002    | 1.075     | <0.001   |
| $R^2$                                        | 0.151     |          | 0.330     |          | 0.340     |          |
| adj.- $R^2$                                  | 0.041     |          | 0.244     |          | 0.254     |          |

Adj.- $R^2$ : adjusted coefficient of determination.

### Supplementary Table S3-3.

Rate ratios (RR) of predictors with two-way fixed effects model.

| Predictor                                    | CRAB      |          | CRKP      |          | CRPA      |          |
|----------------------------------------------|-----------|----------|-----------|----------|-----------|----------|
|                                              | <i>RR</i> | <i>p</i> | <i>RR</i> | <i>p</i> | <i>RR</i> | <i>p</i> |
| Antibiotic consumption (DDDs)                | 0.997     | 0.679    | 1.030     | 0.109    | 0.997     | 0.616    |
| Population density (person/km <sup>2</sup> ) | 0.999     | 0.110    | 1.004     | 0.004    | 1.001     | 0.192    |
| GDP per capita (Yuan)                        | 4.631     | 0.063    | 0.660     | 0.850    | 0.337     | 0.148    |
| Health facilities per 10,000 population      | 1.218     | 0.078    | 0.498     | 0.017    | 1.159     | 0.156    |
| Physicians per 10,000 population             | 0.973     | 0.003    | 1.030     | 0.223    | 1.010     | 0.221    |
| Hospital beds per 10,000 population          | 0.977     | 0.096    | 1.067     | 0.082    | 1.023     | 0.077    |
| Annual average humidity (%)                  | 1.013     | 0.314    | 0.947     | 0.118    | 1.001     | 0.919    |
| Annual average rainfall (mm)                 | 1.000     | 0.877    | 1.000     | 0.200    | 1.000     | 0.671    |
| Average ambient temperature (°C)             | 1.129     | 0.099    | 1.013     | 0.948    | 0.939     | 0.343    |
| $R^2$                                        | 0.129     |          | 0.141     |          | 0.065     |          |
| adj.- $R^2$                                  | -0.161    |          | -0.141    |          | -0.234    |          |

Adj.- $R^2$ : adjusted coefficient of determination.

### Model validation

We predicted the 2019 prevalence (and 95% confidence interval) of antibiotic resistance in all provinces/regions of the CHINET using the established regression models, and compared the predicting values with the published data extracted from the China Antimicrobial Resistance Surveillance System (CARSS).

CRAB was highly prevalent in Tibet, Guangxi, Hainan and Chongqing, compared with very low prevalence of CRKP and CRPA. The unstandardized estimations of modelling produced a higher prediction accuracy for CRAB as indicated by the Index of Estimation Deviation in comparison with CRKP and CRPA.

### Supplementary Table S4.

#### Unstandardized estimations of antibiotic resistance prevalence

| Region    | CRAB      |           |      | CRKP      |           |      | CRPA      |           |      |
|-----------|-----------|-----------|------|-----------|-----------|------|-----------|-----------|------|
|           | Published | Predicted | IED  | Published | Predicted | IED  | Published | Predicted | IED  |
| Tibet     | 24.4      | 29.3      | 0.17 | 0.6       | 0.2       | 0.70 | 7.1       | 8.8       | 0.19 |
| Guangxi   | 56.0      | 68.6      | 0.18 | 3.2       | 23.2      | 0.86 | 13.4      | 27.8      | 0.52 |
| Hainan    | 45.9      | 68.0      | 0.32 | 3.8       | 35.2      | 0.89 | 11.8      | 36.3      | 0.67 |
| Chongqing | 59.6      | 88.9      | 0.33 | 5.5       | 46.5      | 0.88 | 11.8      | 37.9      | 0.69 |

Note: IED represents Index of Estimation Deviation, which is the gap between 1 and the smaller one of published/predicted and predicted/published, with a higher IED indicating higher deviation.

Unstandardized estimations and prediction intervals of antibiotic resistance prevalence in 2019 was shown in **Supplementary Table S5**.

**Supplementary Table S5.**

Unstandardized estimations and prediction intervals of antibiotic resistance prevalence in 2019.

| Province       | CRAB(%) |       |               | CRKP(%) |      |              | CRPA(%) |      |              |
|----------------|---------|-------|---------------|---------|------|--------------|---------|------|--------------|
|                | ABR     | PRE   | 95% CI        | ABR     | PRE  | 95% CI       | ABR     | PRE  | 95% CI       |
| Ningxia        | 82.5    | 75.8  | (28.1, 204.5) | 7.6     | 14.6 | (1.5, 144.4) | 17.4    | 21.7 | (9.5, 49.7)  |
| Tianjin        | 59.9    | 58.3  | (21.4, 158.9) | 14.5    | 7.9  | (0.8, 80.0)  | 26.0    | 23.0 | (9.9, 53.2)  |
| Beijing        | 77.7    | 88.7  | (31.7, 248.2) | 23.7    | 20.1 | (1.9, 217.9) | 21.2    | 30.1 | (12.7, 71.3) |
| Xinjiang       | 62.2    | 93.0  | (34.7, 249.5) | 4.6     | 18.0 | (1.8, 177.0) | 17.6    | 23.4 | (10.2, 53.4) |
| Shanghai       | 61.7    | 76.3  | (27.9, 208.9) | 28.7    | 26.0 | (2.5, 268.1) | 32.5    | 32.3 | (13.9, 75.0) |
| Inner Mongolia | 59.7    | 63.8  | (23.8, 171.0) | 5.9     | 4.0  | (0.4, 39.4)  | 19.8    | 16.6 | (7.3, 38.0)  |
| Gansu          | 64.4    | 76.0  | (28.5, 202.6) | 2.0     | 5.4  | (0.6, 52.1)  | 15.6    | 17.9 | (7.9, 40.7)  |
| Jilin          | 60.8    | 70.5  | (26.4, 187.9) | 2.0     | 5.6  | (0.6, 53.9)  | 13.8    | 16.8 | (7.4, 38.2)  |
| Shanxi         | 76.7    | 56.6  | (21.1, 151.9) | 4.6     | 3.4  | (0.3, 33.0)  | 27.0    | 17.5 | (7.6, 39.9)  |
| Fujian         | 55.3    | 62.5  | (23.3, 167.9) | 6.2     | 12.0 | (1.2, 117.9) | 20.1    | 28.6 | (12.5, 65.2) |
| Shaanxi        | 90.1    | 81.7  | (30.5, 218.7) | 27.1    | 15.6 | (1.6, 152.4) | 43.0    | 28.6 | (12.5, 65.2) |
| Heilongjiang   | 86.6    | 92.1  | (33.9, 250.5) | 11.7    | 14.2 | (1.4, 143.9) | 20.9    | 19.7 | (8.6, 45.6)  |
| Liaoning       | 66.0    | 79.9  | (29.8, 214.0) | 11.2    | 16.2 | (1.7, 158.5) | 34.2    | 24.1 | (10.6, 54.9) |
| Jiangxi        | 44.4    | 62.5  | (23.4, 167.0) | 8.0     | 15.6 | (1.6, 151.4) | 5.8     | 24.3 | (10.7, 55.3) |
| Yunnan         | 75.3    | 88.7  | (32.8, 239.7) | 31.3    | 45.6 | (4.6, 454.8) | 44.5    | 30.8 | (13.4, 70.8) |
| Zhejiang       | 65.4    | 78.5  | (29.4, 209.6) | 38.8    | 21.0 | (2.2, 204.5) | 31.0    | 28.9 | (12.7, 65.7) |
| Hubei          | 80.5    | 94.2  | (35.2, 252.0) | 21.8    | 32.1 | (3.3, 314.2) | 16.0    | 34.0 | (14.9, 77.6) |
| Anhui          | 65.6    | 85.9  | (31.6, 233.7) | 25.0    | 18.4 | (1.8, 186.9) | 17.1    | 29.5 | (12.8, 68.2) |
| Hunan          | 92.4    | 89.6  | (33.4, 240.5) | 33.0    | 25.6 | (2.6, 252.1) | 38.1    | 32.1 | (14.0, 73.4) |
| Hebei          | 84.5    | 52.4  | (19.3, 142.2) | 38.6    | 4.2  | (0.4, 42.5)  | 34.8    | 20.0 | (8.7, 46.2)  |
| Jiangsu        | 65.7    | 93.9  | (34.6, 254.8) | 21.3    | 30.6 | (3.0, 308.5) | 18.9    | 37.6 | (16.3, 86.6) |
| Sichuan        | 74.2    | 93.2  | (34.2, 254.0) | 22.4    | 14.3 | (1.4, 144.9) | 34.0    | 30.6 | (13.2, 70.8) |
| Henan          | 96.5    | 74.0  | (27.3, 201.1) | 62.1    | 29.6 | (2.9, 298.6) | 36.2    | 29.6 | (12.8, 68.2) |
| Shandong       | 60.0    | 69.6  | (26.1, 185.5) | 16.0    | 10.4 | (1.1, 101.1) | 14.2    | 26.2 | (11.5, 59.4) |
| Guangdong      | 56.5    | 61.5  | (22.8, 166.0) | 16.5    | 22.3 | (2.2, 221.9) | 17.9    | 26.8 | (11.7, 61.5) |
| Guizhou        | 60.4    | 100.4 | (36.9, 272.6) | 39.6    | 23.3 | (2.3, 235.2) | 12.9    | 28.1 | (12.2, 65.1) |
| Qinghai        | 9.2     | 72.7  | (27.1, 195.3) | 1.8     | 3.6  | (0.4, 35.5)  | 12.3    | 15.6 | (6.8, 35.8)  |
| Tibet          | 24.4    | 29.3  | (9.6, 90.0)   | 0.6     | 0.2  | (0, 2.4)     | 7.1     | 8.8  | (3.4, 22.5)  |
| Guangxi        | 56.0    | 68.6  | (25.6, 183.5) | 3.2     | 23.2 | (2.4, 226.6) | 13.4    | 27.8 | (12.2, 63.3) |
| Hainan         | 45.9    | 68.0  | (25.2, 183.6) | 3.8     | 35.2 | (3.5, 352.1) | 11.8    | 36.3 | (15.8, 83.3) |
| Chongqing      | 59.6    | 88.9  | (32.8, 240.9) | 5.5     | 46.5 | (4.6, 467.7) | 11.8    | 37.9 | (16.5, 87.3) |

**Supplementary Figure S1.**

The distribution of four administrative types of regions in China.

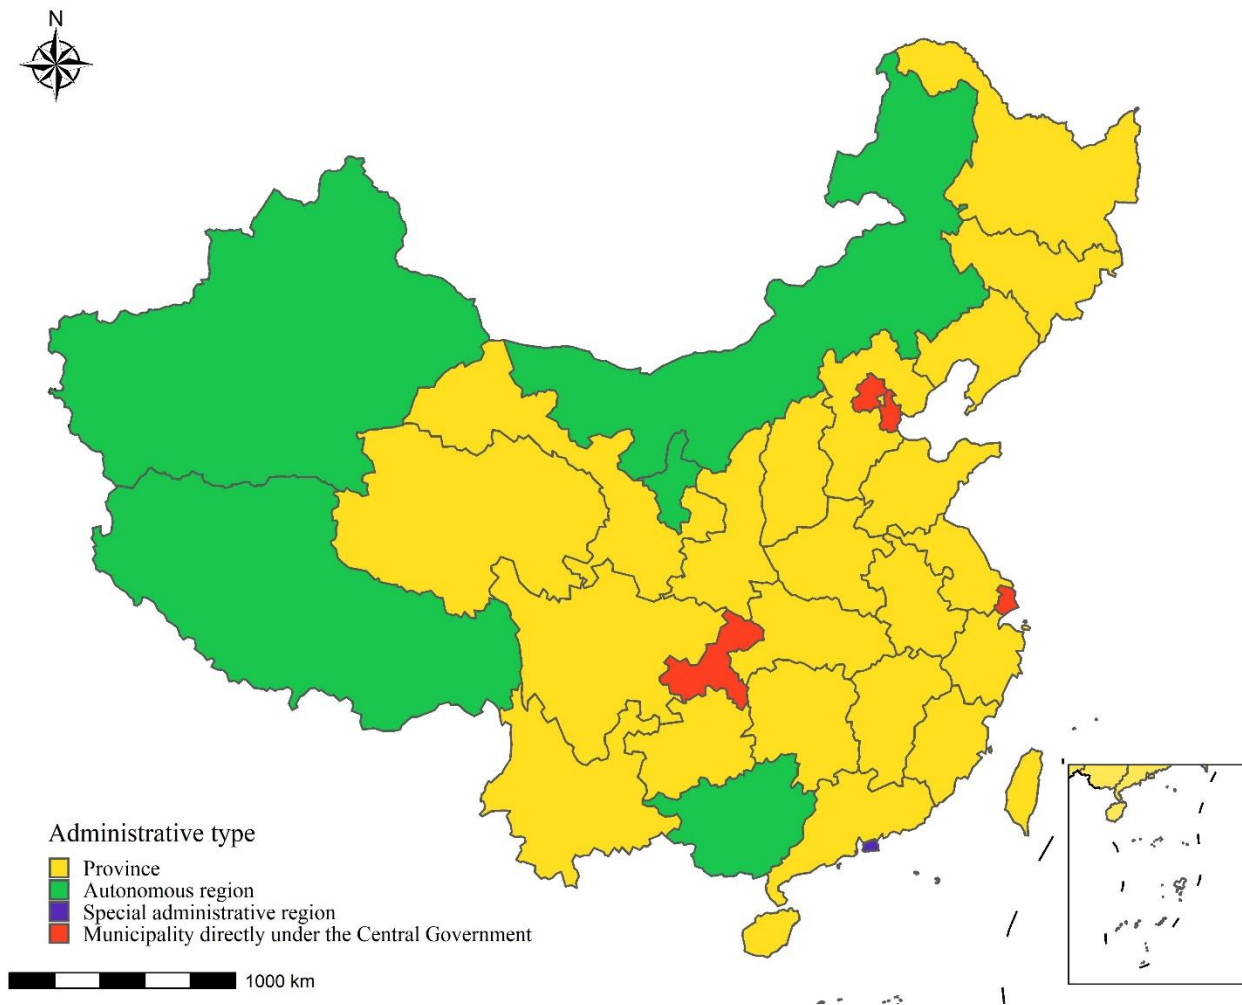

**Supplementary Figure S2.**

Simple division of northern (colder) and southern (warmer) regions in China.

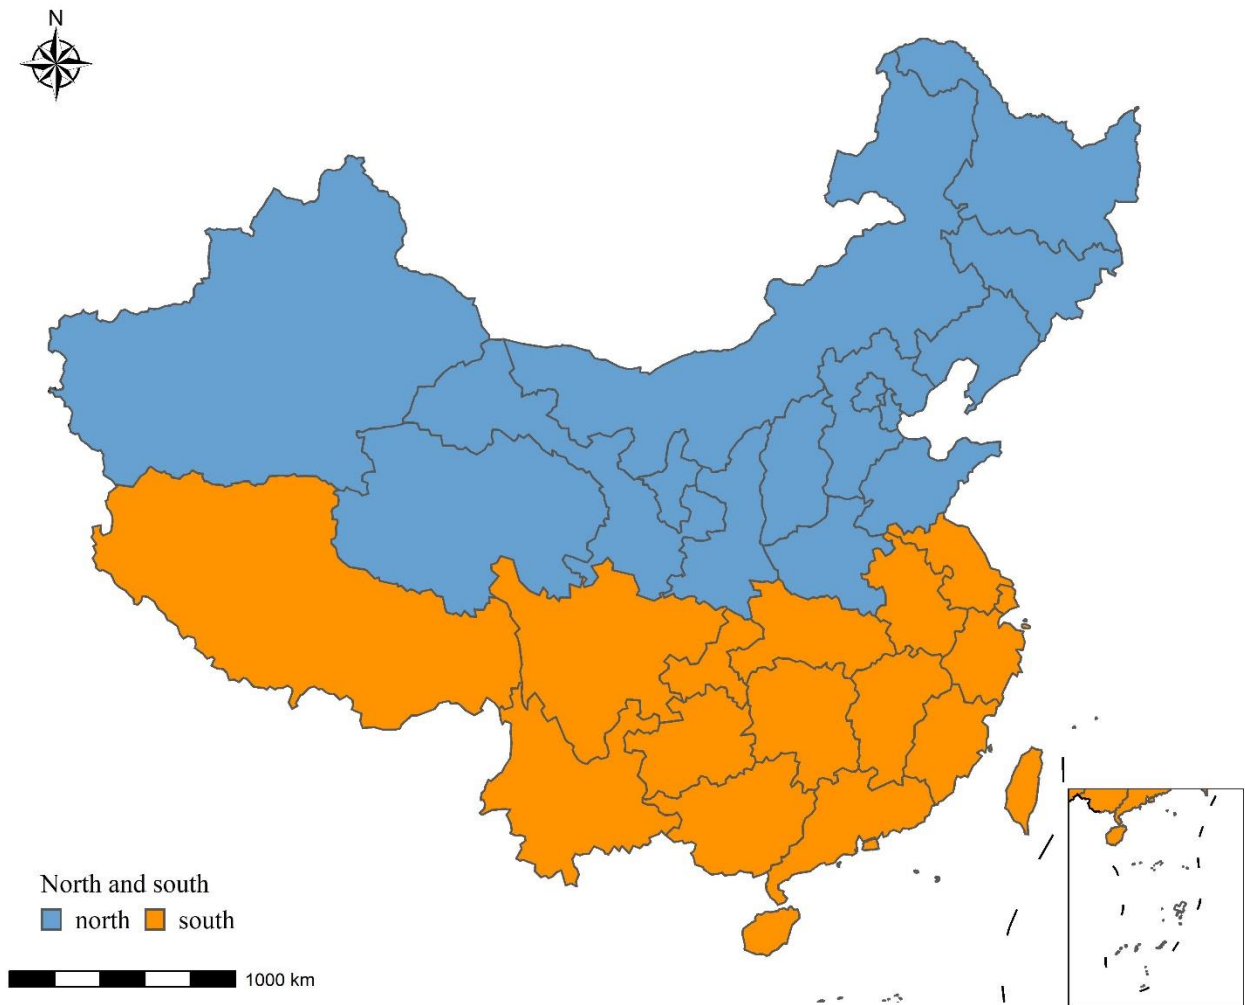

Supplement: mmc1.pdf [file mmc1.pdf]
