# Supplementary material for: Association between antibiotic resistance and increasing ambient temperature in China: An ecological study with nationwide panel data
Source: PubMed Central journal article supplement — Lancet Reg Health West Pac. 2022 Nov 14;30:100628. doi: 10.1016/j.lanwpc.2022.100628 (PMC9672962; doi:10.1016/j.lanwpc.2022.100628), 2022-11-14
Supplement: mmc2.pdf [file mmc2.pdf]

## 中国环境气温升高与抗生素耐药性的关联：基于全国面板数据的生态学研究

### 摘要

**背景** 抗生素耐药导致了更长的住院时间、更昂贵的医疗费用和更高的死亡率。然而，气候变化对抗生素耐药的影响仍然没有定论。本研究旨在探索抗生素耐药与气温及其时间变化的关系，以填补研究空白。

**方法** 我们收集了中国细菌耐药监测网（CHINET）2005 年至 2019 年期间 28 个省份对碳青霉烯类抗生素耐药的鲍曼不动杆菌（CRAB）、肺炎克雷伯菌（CRKP）和铜绿假单胞菌（CRPA）的检出率，并建立对数线性模型调整社会经济、卫生服务和环境因素的影响，以确定环境气温与抗生素耐药性之间的关联。

**结果** 平均气温每升高 1°C，CRKP 检出率上升到 1.14 倍（95%-CI [1.07~1.23]）和 CRPA 检出率提高到 1.06 倍（95%-CI [2.03~1.08]）相关。气温的逐年变化具有累积效应，其中前四年的气温变化累积总和对抗生素耐药性的影响最大。较高的抗生素耐药率还与抗生素消费量较大、卫生设施密度低、医院床位密度高和管理腐败程度高有关。

**结论** 中国各地区较高的抗生素耐药率与气温升高存在显著关联。环境气温升高对抗生素耐药性发展的影响在不同耐药菌株中有所差异。

**关键词：** 抗生素耐药；气温；气候变化；中国
